# Supplementary material for: Population genetic models of GERP scores suggest pervasive turnover of constrained sites across mammalian evolution
Source: PubMed Central journal article supplement (PMC7286533; doi:10.1371/journal.pgen.1008827), 2020-05-29

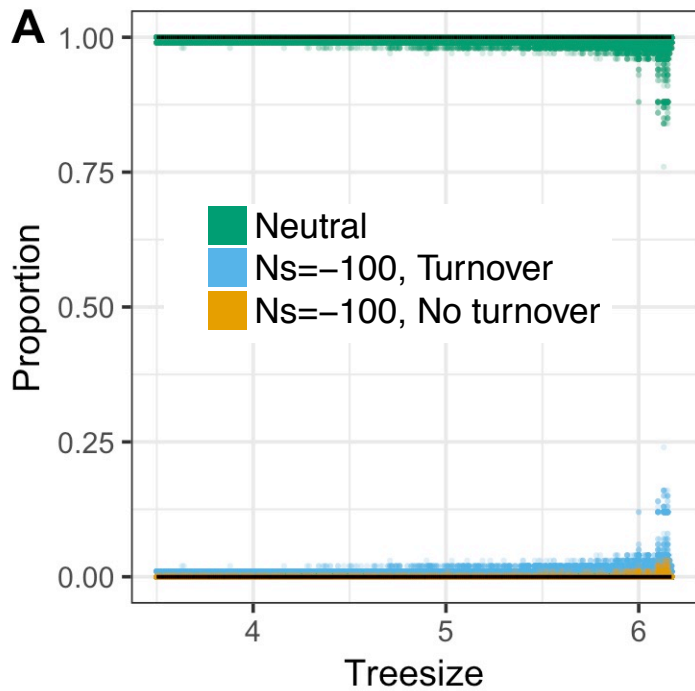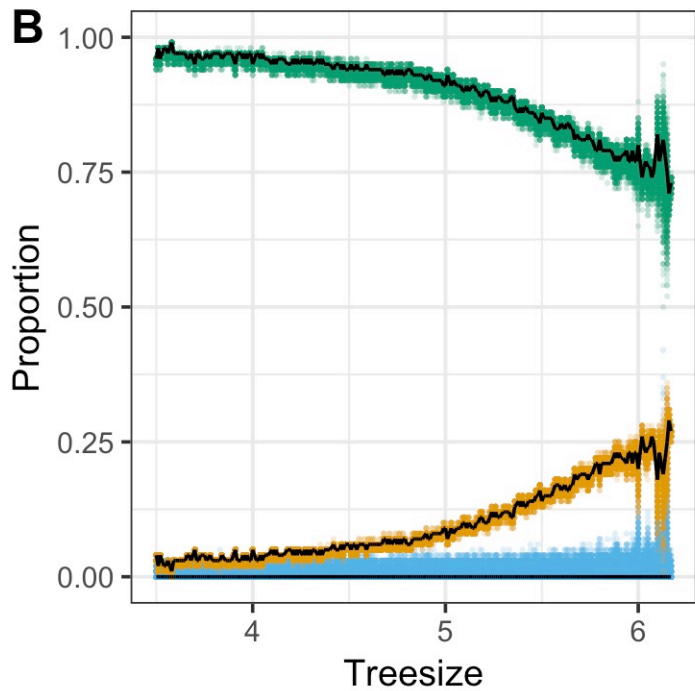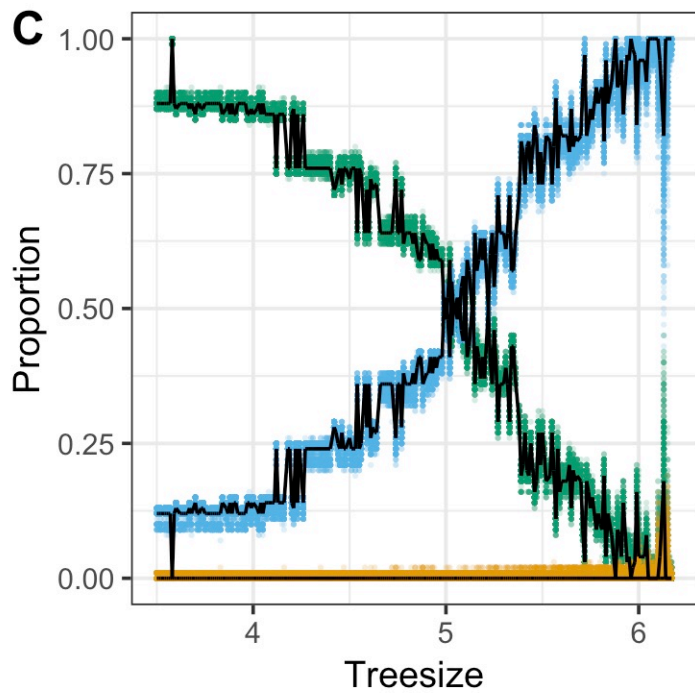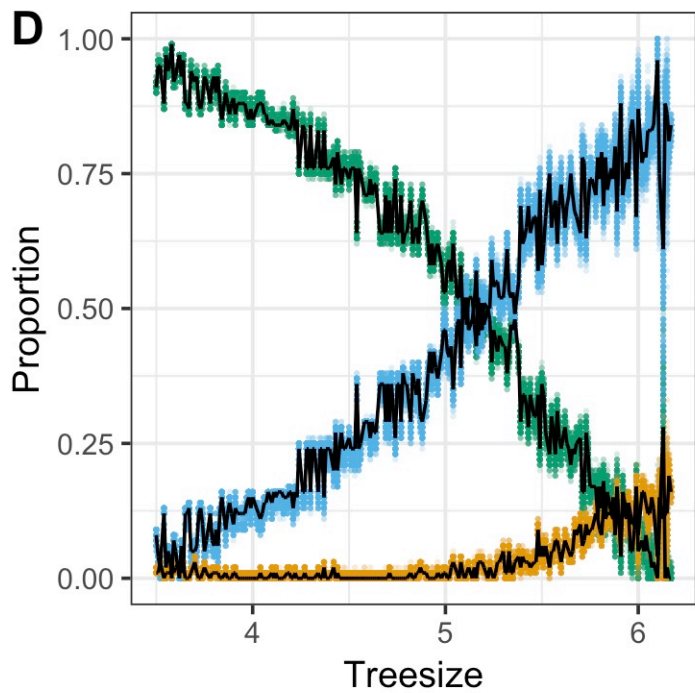

Supplement: pgen.1008827.s012.pdf [file pgen.1008827.s012.pdf]
