# Supplementary material for: Population genetic models of GERP scores suggest pervasive turnover of constrained sites across mammalian evolution
Source: PLOS journal article supplement (doi:10.1371/journal.pgen.1008827), 2020-05-29

**A** Simulations according to tree in Fig. S14A: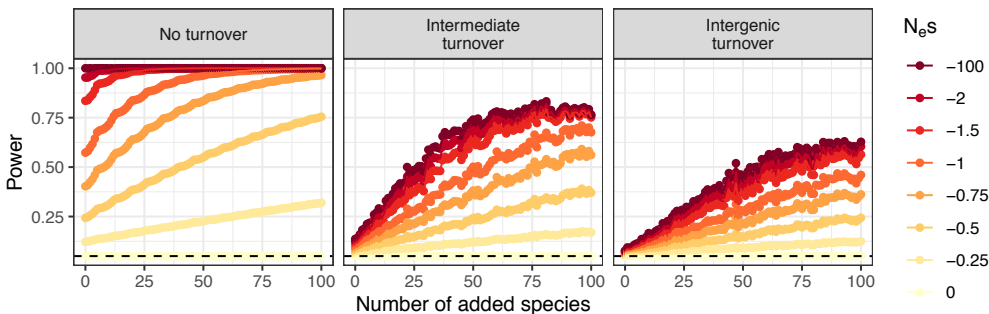**B** Simulations according to tree in Fig. S14B: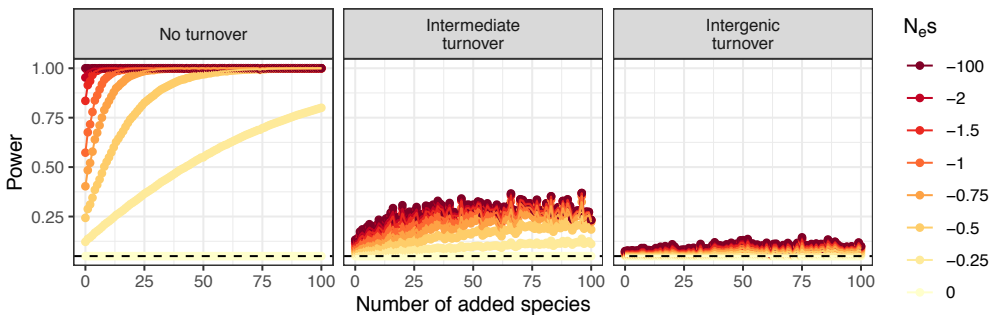**C** Simulations according to tree in Fig. S14C: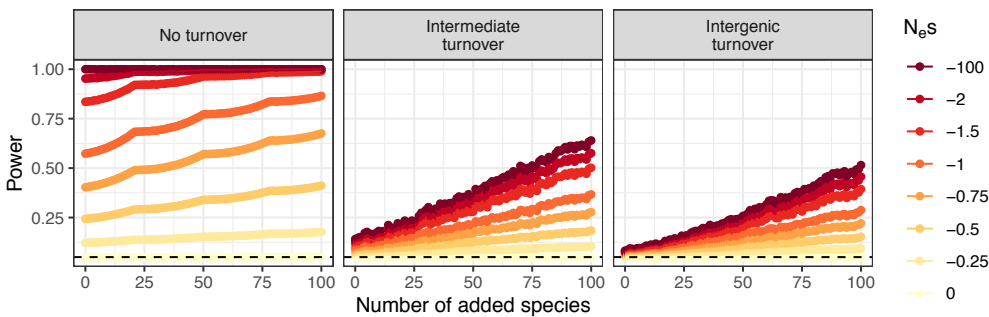**D** Simulations according to tree in Fig. S14D: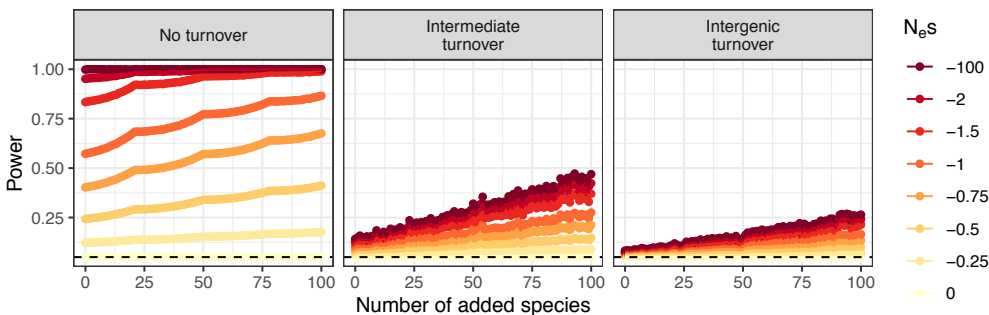

Supplement: S17 (10.1371/journal.pgen.1008827.s017) [file journal.pgen.1008827.s017]
